# Supplementary material for: Liquid-assisted solid-state reaction: assembly of (6,3) and (10,3) hydrogen-bonded networks based on [M(Hbiim)3] by oxidation of [M(H2biim)3]2+ complexes in the presence of acetate anions
Source: Royal Society of Chemistry journal article supplement (doi:10.1039/c1ce00009h), 2011-01-01
Supplement: c1ce00009h.pdf [file c1ce00009h.pdf]

**Liquid-assisted solid-state reaction: Assembly of (6,3) and (10,3) hydrogen-bonded networks based on  $[M(\text{Hbiim})_3]$  by oxidation of  $[M(\text{H}_2\text{biim})_3]^{2+}$  complexes in the presence of acetate anion**

*Yu-Hui Tan,<sup>a</sup> Li-Fei Yang,<sup>a</sup> Man-Li Cao,<sup>b</sup> Jin-Ji Wu,<sup>a</sup> and Bao-Hui Ye<sup>\*a</sup>*

MOE Laboratory of Bioinorganic and Synthetic Chemistry, School of Chemistry and Chemical Engineering, Sun Yat-Sen University, Guangzhou 510275, China, and Department of Chemistry, Guangdong University of Education, Guangzhou 510303, China.

E-mail: cesybh@mail.sysu.edu.cn (B.-H. Ye)

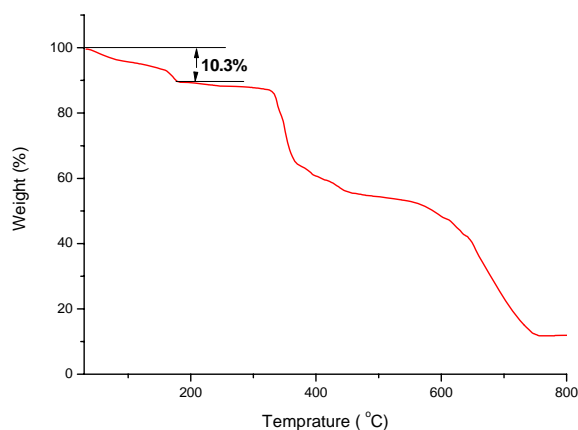

**Fig. S1.** TGA of complex 2.

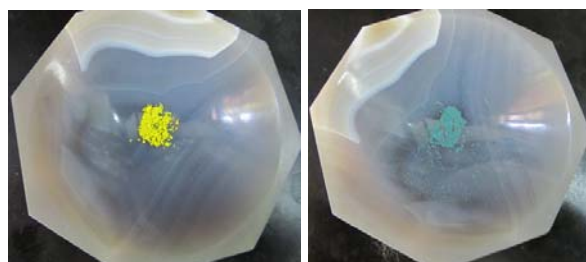

**Fig. S2.** The color changes of the reactant (left) and the product (right) in the solid-state reaction of complex **1**.

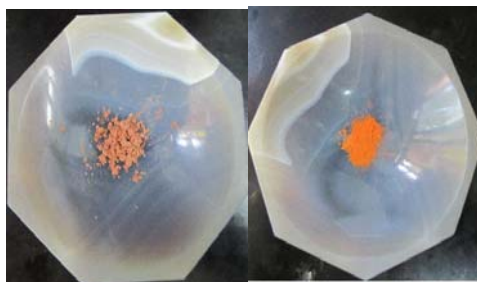

**Fig. S3.** The color changes of the reactant (left) and the product (right) in the solid-state reaction of complex **2**.

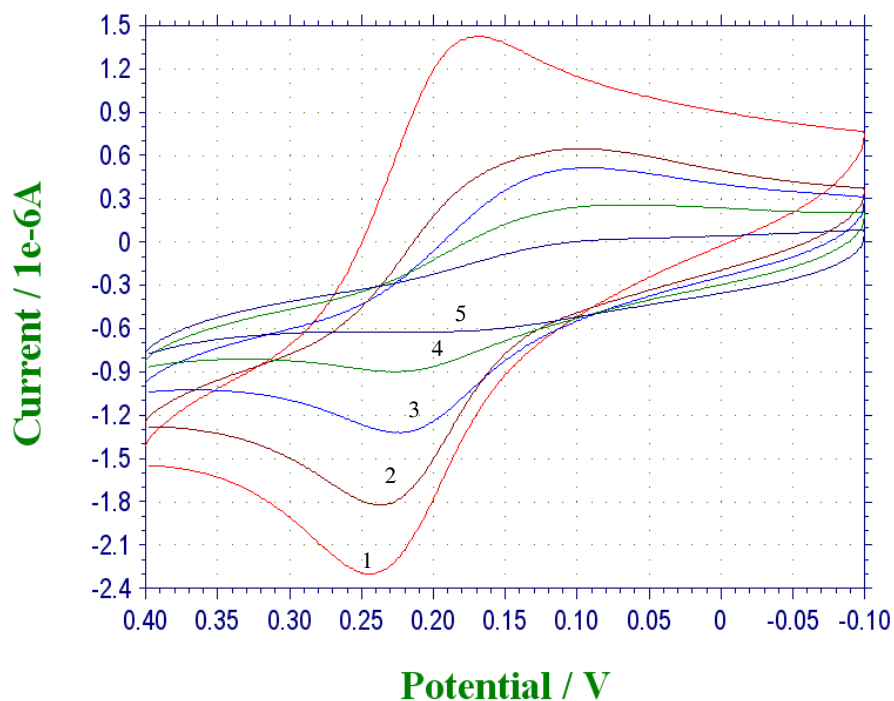

**Fig. S4.** The CV curves of  $[\text{Ru}(\text{H}_2\text{biim})_3](\text{PF}_6)_2$  in acetonitrile ( $5 \times 10^{-3}$  M, vs Ag/AgNO<sub>3</sub>) upon addition of Bu<sub>4</sub>NOAc: (1) 0 equiv, (2) 0.5 equiv, (3) 1 equiv, (4) 1.5 equiv, and (5) 2 equiv.
